# Supplementary material for: In vitro biocompatibility study of sub-5 nm silica-coated magnetic iron oxide fluorescent nanoparticles for potential biomedical application
Source: PubMed Central journal article supplement (PMC5395943; doi:10.1038/srep46513), 2017-04-19
Supplement: srep46513-s1.pdf [file srep46513-s1.pdf]

# ***In vitro* biocompatibility study of sub-5nm silica-coated magnetic iron oxide fluorescent nanoparticles for potential biomedical application**

Sabrina Foglia,<sup>1a</sup> Mario Ledda,<sup>2a</sup> Daniela Fioretti,<sup>2</sup> Giovanna Iucci,<sup>3</sup> Massimiliano Papi,<sup>4</sup> Giovanni Capellini,<sup>3</sup> Maria Grazia Lolli,<sup>2</sup> Settimio Grimaldi,<sup>2</sup> Monica Rinaldi,<sup>2b</sup> and Antonella Lisi<sup>2b\*</sup>

<sup>1</sup>Institute of Materials for Electronics and Magnetism (IMEM), Department of Engineering, ICT and technologies for energy and transportation, National Research Council (CNR), Parma, Italy

<sup>2</sup>Institute of Translational Pharmacology (IFT), Department of Biomedical Sciences, National Research Council (CNR), Rome, Italy

<sup>3</sup>Department of Science, University Roma Tre, Rome, Italy

<sup>4</sup>*Institute of Physics*, Catholic University of the Sacred Heart, Rome, Italy

<sup>a</sup>These authors shared first authorship

<sup>b</sup>These authors shared senior authorship

Correspondence and requests for materials should be addressed to A.L. (email: [antonella.lisi@ift.cnr.it](mailto:antonella.lisi@ift.cnr.it))

## **Supplementary Methods**

### **Nanoparticles synthesis**

Magnetite nanoparticles were synthesized by procedure reported in Vayssières *et al.*,<sup>1</sup> using simpler co-precipitation of ions Fe<sup>2+</sup> and Fe<sup>3+</sup> in a solution containing a mixture of Fe(NO)<sub>3</sub> and FeCl<sub>2</sub> and NaNO<sub>3</sub>, in a 3M NaNO<sub>3</sub> solution. The pH of the medium was kept constant in a range from 10 to 12, by addition of the corresponding base (NaOH). The reactions were performed at room temperature, controlled atmosphere, with continuous bubbling of nitrogen. Fe<sub>3</sub>O<sub>4</sub> nanopowder was collected after centrifugation (11000 rpm, 10 min) and dried under dynamic vacuum.

1. Vayssieres, L., Chaneac, C., Tronc, E. & Jolivet, J. P. Size Tailoring of Magnetite Particles Formed by Aqueous Precipitation: An Example of Thermodynamic Stability of Nanometric Oxide Particles. *J. Colloid Interface Sci.* **205**, 205-212 (1998).

### **X-ray diffraction analysis (XRD)**

XRD measurements were performed using a powder diffractometer (Philips X'Pert Pro) operating in the reflection mode with CuK $\alpha$  radiation and equipped with a graphite back monochromator.

### **Magnetization measurements**

The magnetic property of the nanoparticles was analyzed by vibrating sample magnetometry (VSM) and superconducting quantum interference device (SQUID) at a magnetic field of 100 Oe for both field-cooling (FC) and zero-field-cooling (ZFC).

### **Phase contrast and Fluorescence Microscopy**

The CaCo-2 cells (2x10<sup>4</sup> cells/cm<sup>2</sup>) were seeded on cover glasses in a 24-well plate and allowed to adhere for 24h. Then sub-5 SIO-FI nanoparticles, treated ultrasonically for 5 min to break up aggregation, were dispersed in cell culture medium and added to the CaCo-2 cells at a concentration of 10  $\mu$ g/ml, 50 $\mu$ g/ml and 100  $\mu$ g/ml. 48h after exposure the cells were repeatedly washed with PBS and fixed in paraformaldehyde 4% at 4°C for 10 min, then washed twice in Ca<sup>2+</sup>/Mg<sup>2+</sup>-free PBS and stained for nuclei localization with Hoechst 33342 (trihydrochloride trihydrate). Phase contrast and fluorescence measurements were performed by using an inverted microscope (Olympus IX51, RT Slider SPOT - Diagnostic instruments, Sterling Heights, MI, USA) equipped

with a 20X, 40X and 60X objective and with a cooled CCD camera (Spot RT Slider, Diagnostic Instruments).

### **Fluorescence microscopy analysis of Rhodamine phalloidin-labelled F-actin**

The CaCo-2 cells ( $2 \times 10^4$  cells/cm<sup>2</sup>) were seeded on cover glasses in a 24-well plate and after 24 h of culture incubated with sub-5 SIO-FI nanoparticles at three different concentrations (10 µg/ml, 50 µg/ml, and 100 µg/ml). 7 days after exposure the cells were repeatedly washed with PBS and fixed in paraformaldehyde 4% at 4°C for 10 min, washed twice in Ca<sup>2+</sup>/Mg<sup>2+</sup>-free PBS and permeabilized at room temperature for 15 min (0.1% Triton X-100, 1% BSA; Sigma-Aldrich). The cells were also incubated with phalloidin tetramethylrhodamine isothiocyanate conjugated (1:100), an anti-actin toxin (Sigma), in a blocking buffer for 1 h. Cells were washed three times with PBS, counterstained for nuclei localization with Hoechst 33342 (trihydrochloride-trihydrate), and examined. Fluorescence measurements were using an inverted microscope (Olympus IX51, RT Slider SPOT - Diagnostic instruments, Sterling Heights, MI, USA) equipped with a 20X, 40X and 60X objective and with a cooled CCD camera (Spot RT Slider, Diagnostic Instruments).

### **Real-time quantitative reverse transcriptase polymerase chain reaction analysis (qPCR)**

Amount of target was calculated using the  $2^{-\Delta\Delta C_t}$  equation.

$\Delta C_t = (\text{average target } C_t - \text{average GAPDH } C_t)$

$\Delta\Delta C_t = (\text{average } \Delta C_t \text{ treated sample} - \text{average } \Delta C_t \text{ untreated sample})$

Before using  $\Delta\Delta C_t$  method for quantification, we performed a validation experiment to demonstrate that efficiency of target genes and reference GAPDH were equal. Real-time PCR was performed with Sybr Green I Mastermix (Applied Biosystems) using an ABI PRISM 7000 Sequence Detection System. Each reaction was run in triplicate and contained 0,5 µl of cDNA template along with 250 nM primers in a final reaction volume of 25 µl. The genes investigated were ALP1 and VIL1. The specific primers used are the following:

ALP1: 5'-ccaggacatgccactcag-3'; 5'-tcagtgcgggtccacacata-3'

VIL1: 5'-gctatctatggtgtgggaag-3'; 5'-cctgtagtcttgggtgtg-3'

GAPDH: 5'-catcatctgcccctct-3'; 5'-caaagttgcatggatgacct-3'

Cycling parameters were 50°C for 2 min., then 95°C for 10 min. in order to activate DNA polymerase, then 40 cycles of 95°C for 15 seconds and finally 60°C for 1 min. The Melting curves were performed using Dissociation Curves software (Applied Biosystems) to ensure that only a single product was amplified. As negative controls, we used tubes where RNA or reverse transcriptase was omitted during the RT reaction.

### **TEM analysis**

The SIO nanoparticles, treated ultrasonically for 5 min to break up aggregation, were dispersed in cell culture medium and added to the CaCo-2 cells at a concentration of 50 µg/ml. After 1h exposure the cells were repeatedly washed with PBS and fixed using glutaraldehyde (2.5%) for 1 h. The cells were washed several times with 0.15M cacodylate buffer and post-fixed with 1.5% osmium tetroxide for 1 h. After further washing with cacodylate buffer, the samples were dehydrated through an ethanol gradient from 70% to 100%, embedded and cut into ultrathin sections and examined as previously described.

## Supplementary Figures

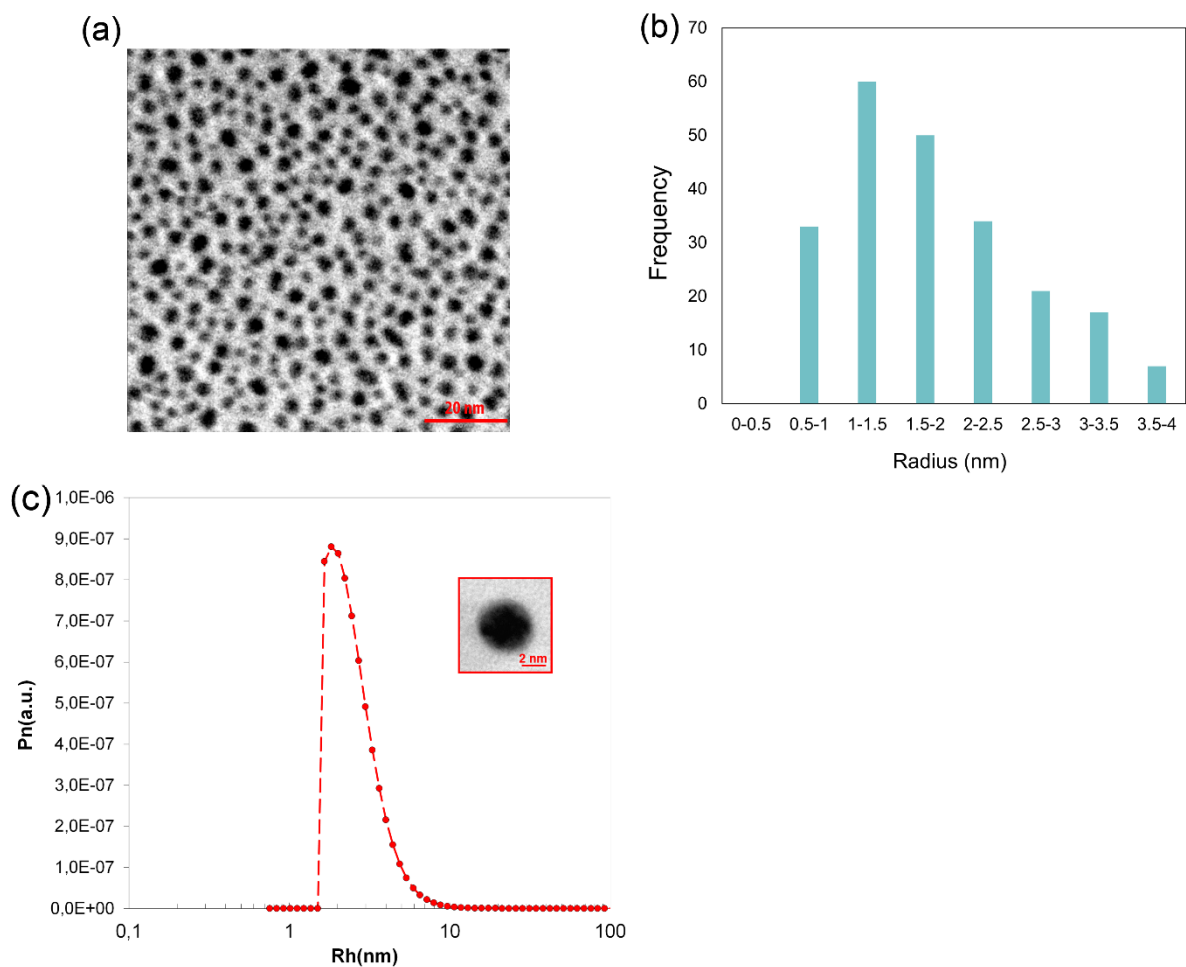

**Supplementary Figure S1. Characterization of 3 nm ultrafine superparamagnetic nanoparticles.** Representative TEM image of spherical 3 nm ultrafine superparamagnetic nanoparticles (a). 3 nm ultrafine nanoparticles size distribution obtained from the TEM images (sample size=220 nanoparticles) (b) and from DLS (c). A representative high-resolution image of a single 3 nm ultrafine nanoparticles is reported in the (c) inset.

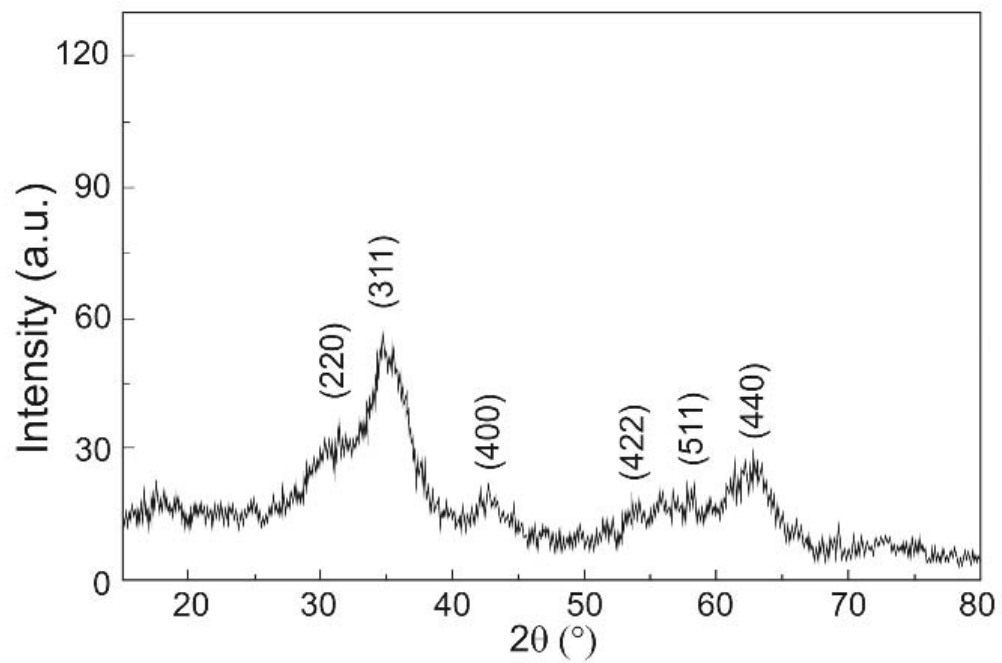

**Supplementary Figure S2. X-ray diffraction pattern of 3 nm ultrafine nanoparticles.**

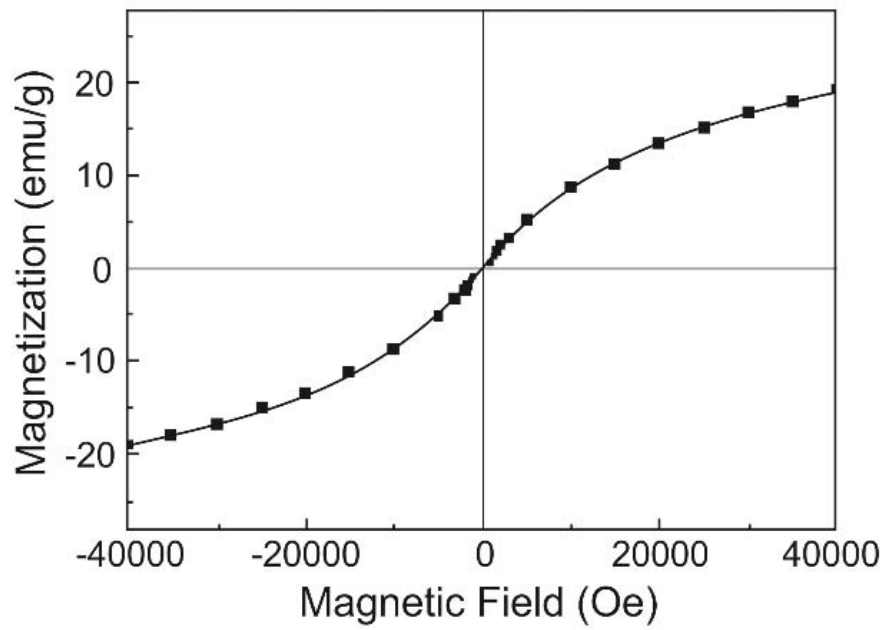

**Supplementary Figure S3. Magnetization curve of 3 nm ultrafine nanoparticles obtained by VSM at room temperature.**

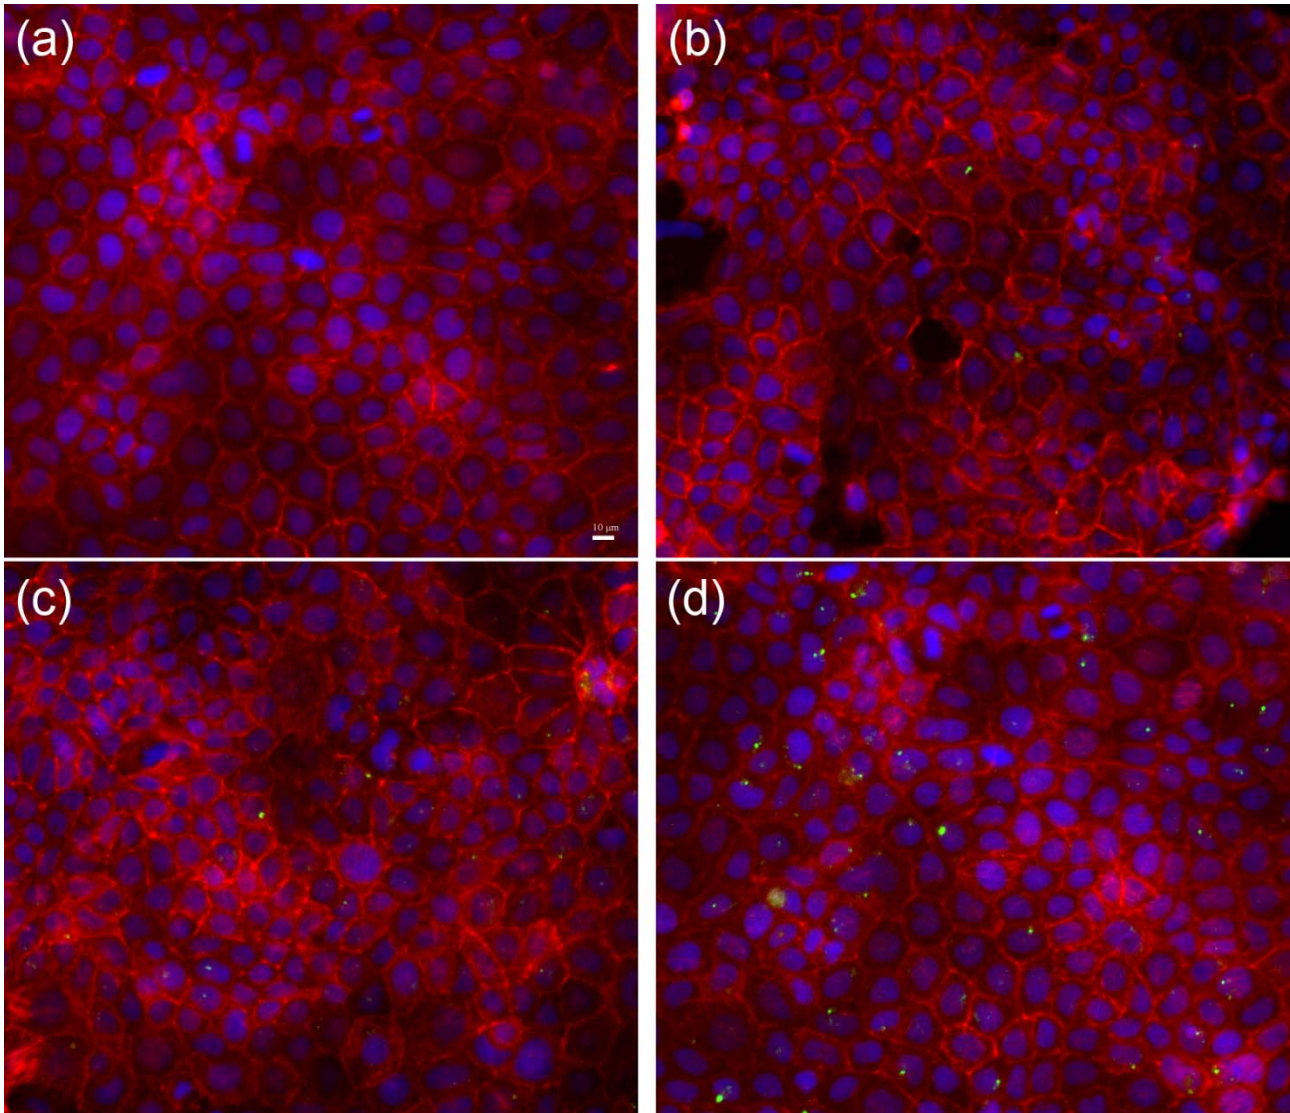

**Supplementary Figure S4. Fluorescence microscopy analysis of rhodamine phalloidin-labelled F-actin (red) of CaCo-2 cells.** Untreated cells (a) and cells treated with 10µg/ml (b), 50 µg/ml (c) and 100 µg/ml (d) of sub-5nm silica-coated magnetic iron oxide fluorescent nanoparticles (green) after 7 days of exposure. The sub-5 SIO-F1 nanoparticles inside the cells are shown and do not interfere with the cytoskeletal organization. Nuclei are counterstained with Hoechst (blue). Photographs were taken at a magnification of 20X.

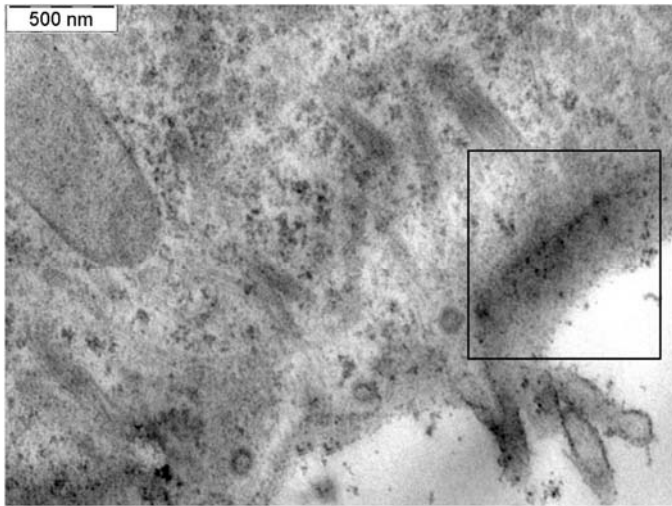

**Supplementary Figure S5. TEM image of Caco-2 cells after 1h of exposure with SiO nanoparticles (50µg/ml). The box highlights the iron oxide nanoparticles within Caco-2 cells.**

## Supplementary Table

| Time (h)     | 1         | 12       | 24       | 36       | 48       | 60       |
|--------------|-----------|----------|----------|----------|----------|----------|
| $D_H$ (nm)   | 8.5±2.2   | 9.4±2.8  | 9.5±2.8  | 9.3±2.7  | 9.5±3.1  | 9.4±2.9  |
| $\zeta$ (mV) | -15.5±3.4 | -9.2±3.1 | -9.2±2.8 | -9.1±3.0 | -9.1±3.1 | -9.2±3.4 |

**Supplementary Table S1. Dynamic Light Scattering and Zeta potential measurements of SiO nanoparticles after exposure to complete cell culture medium.**
